# Supplementary material for: Derivatives of 10,16-Dihydroxyhexadecanoic Acid Isolated from Tomato (Solanum lycopersicum) as Potential Material for Aliphatic Polyesters
Source: PubMed Central journal article supplement (PMC6264701; doi:10.3390/molecules16064923), 2011-06-15

Supplementary Materials

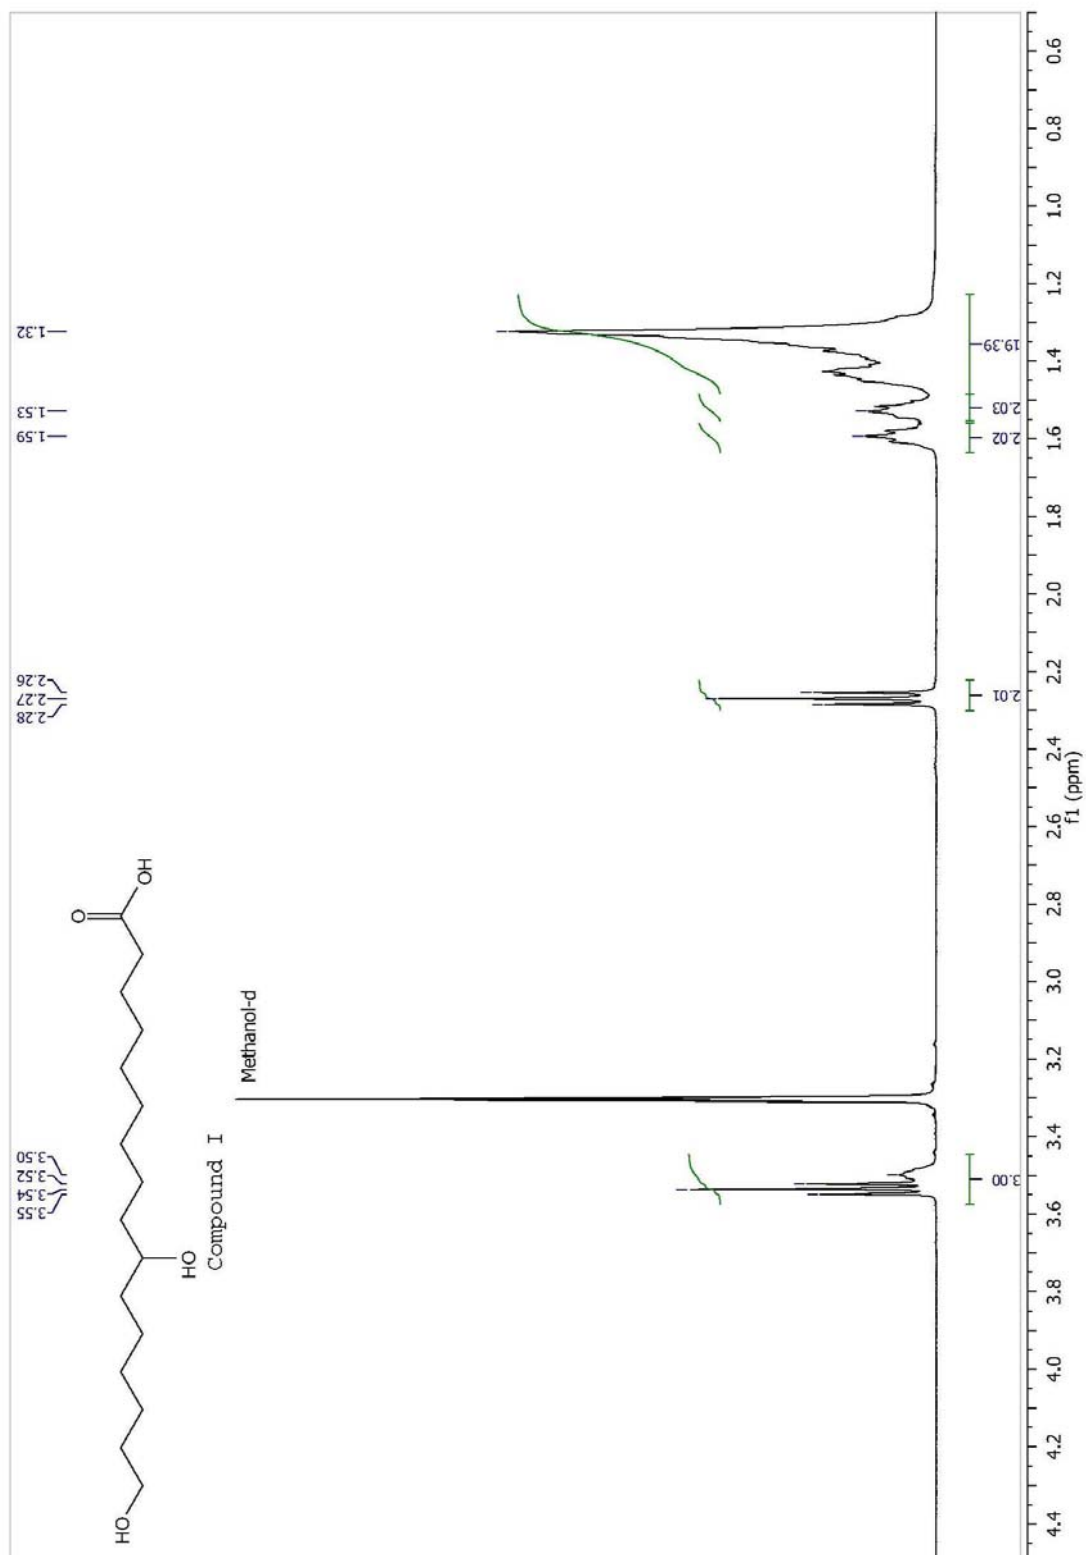

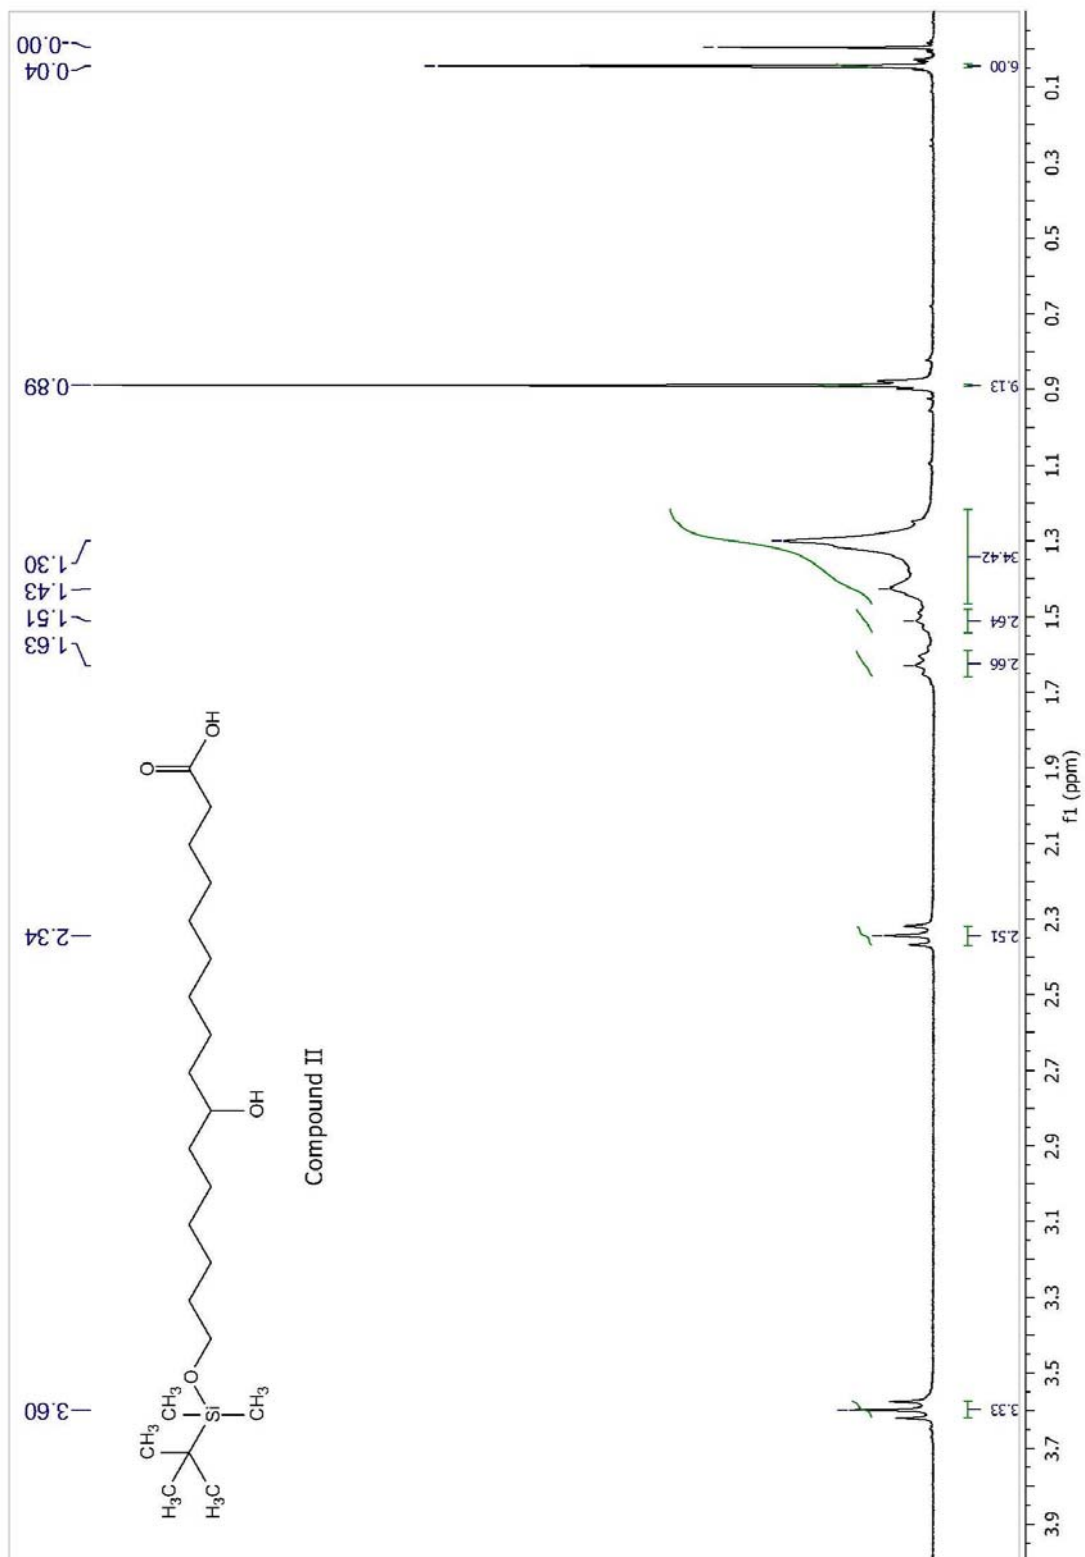

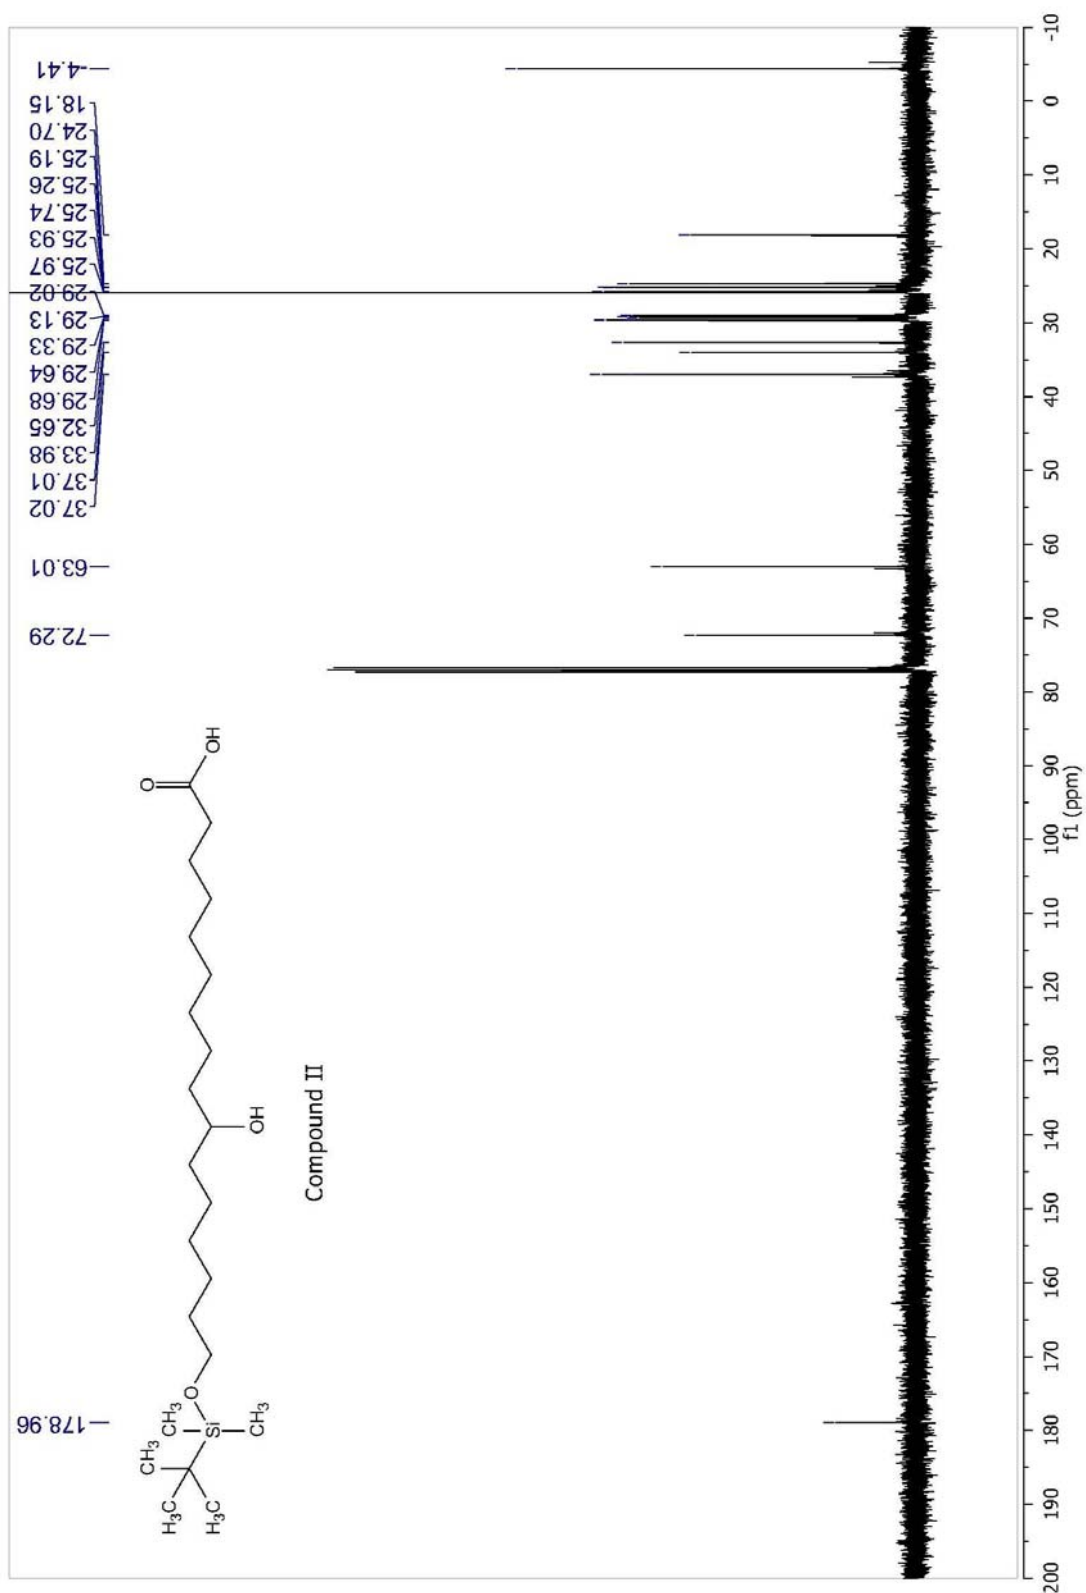

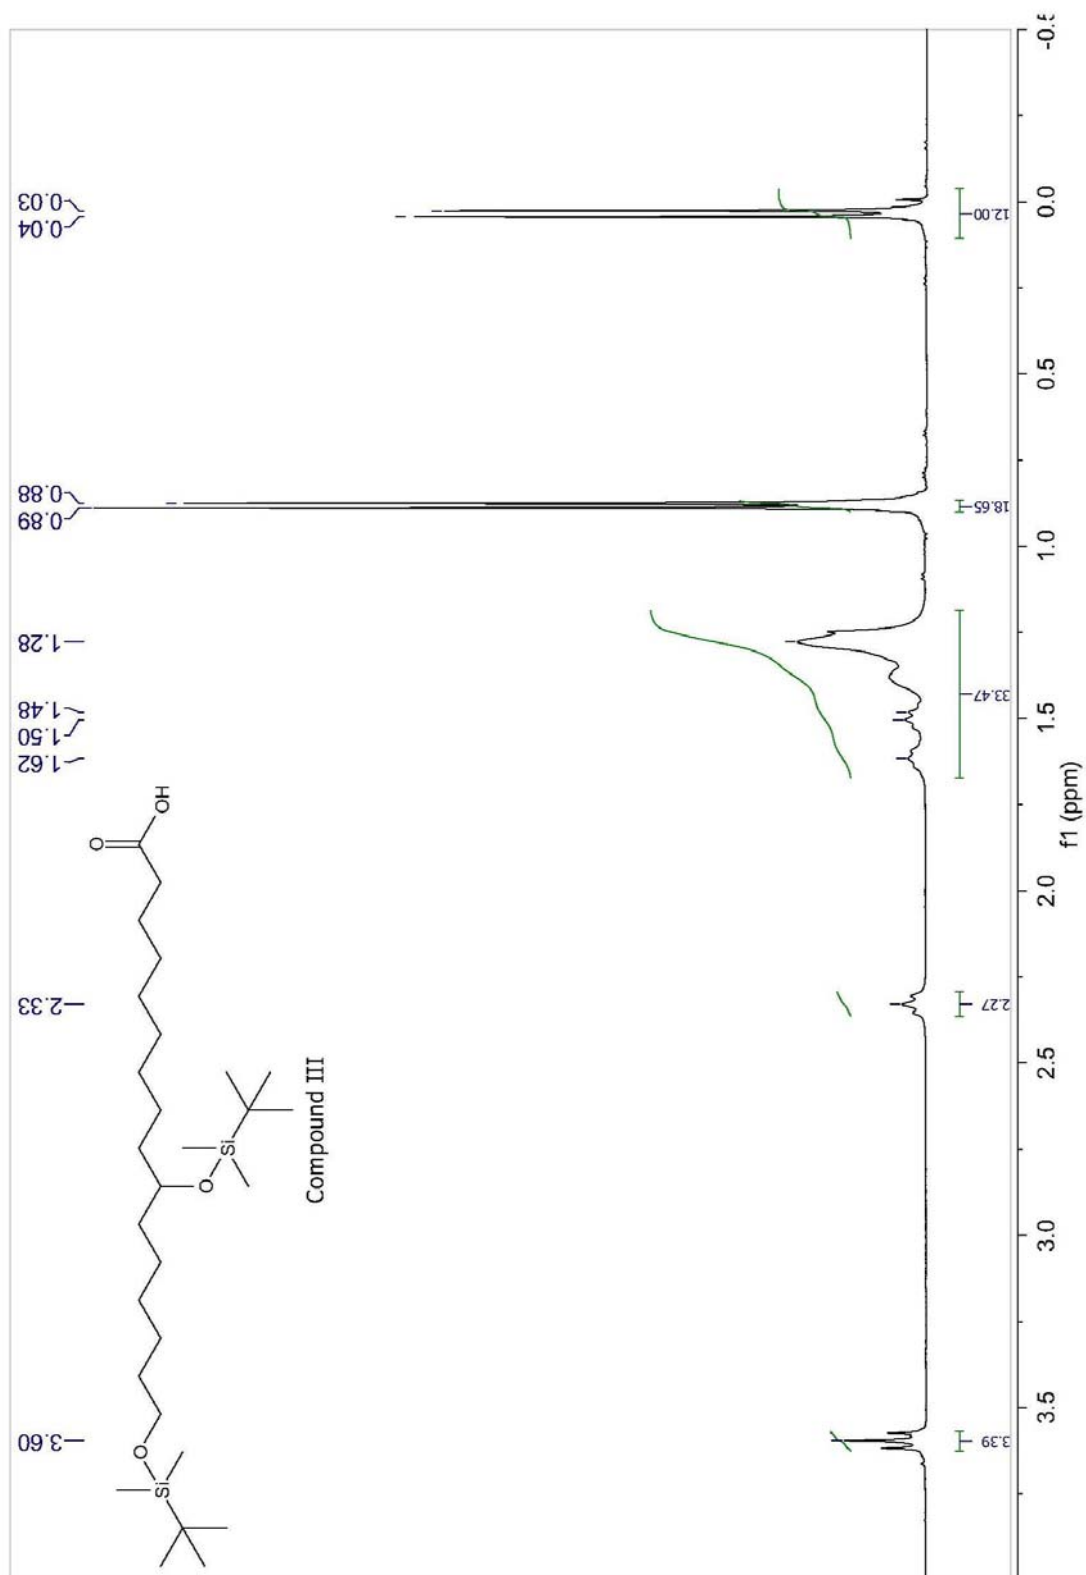

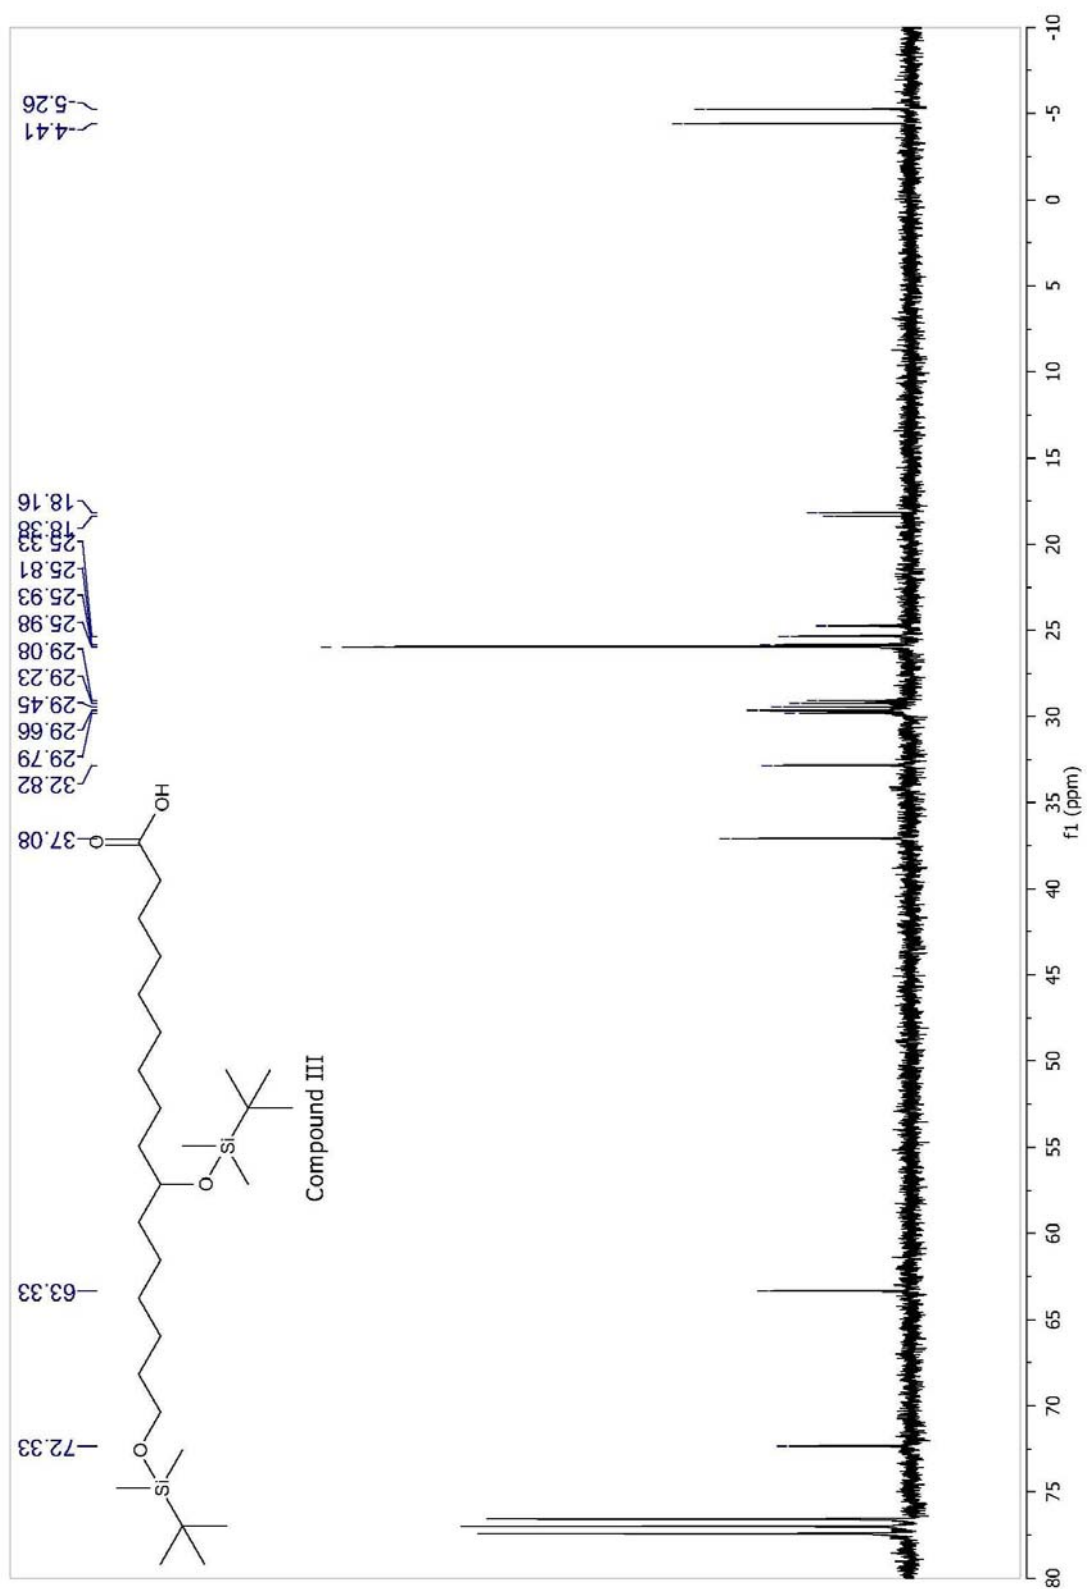

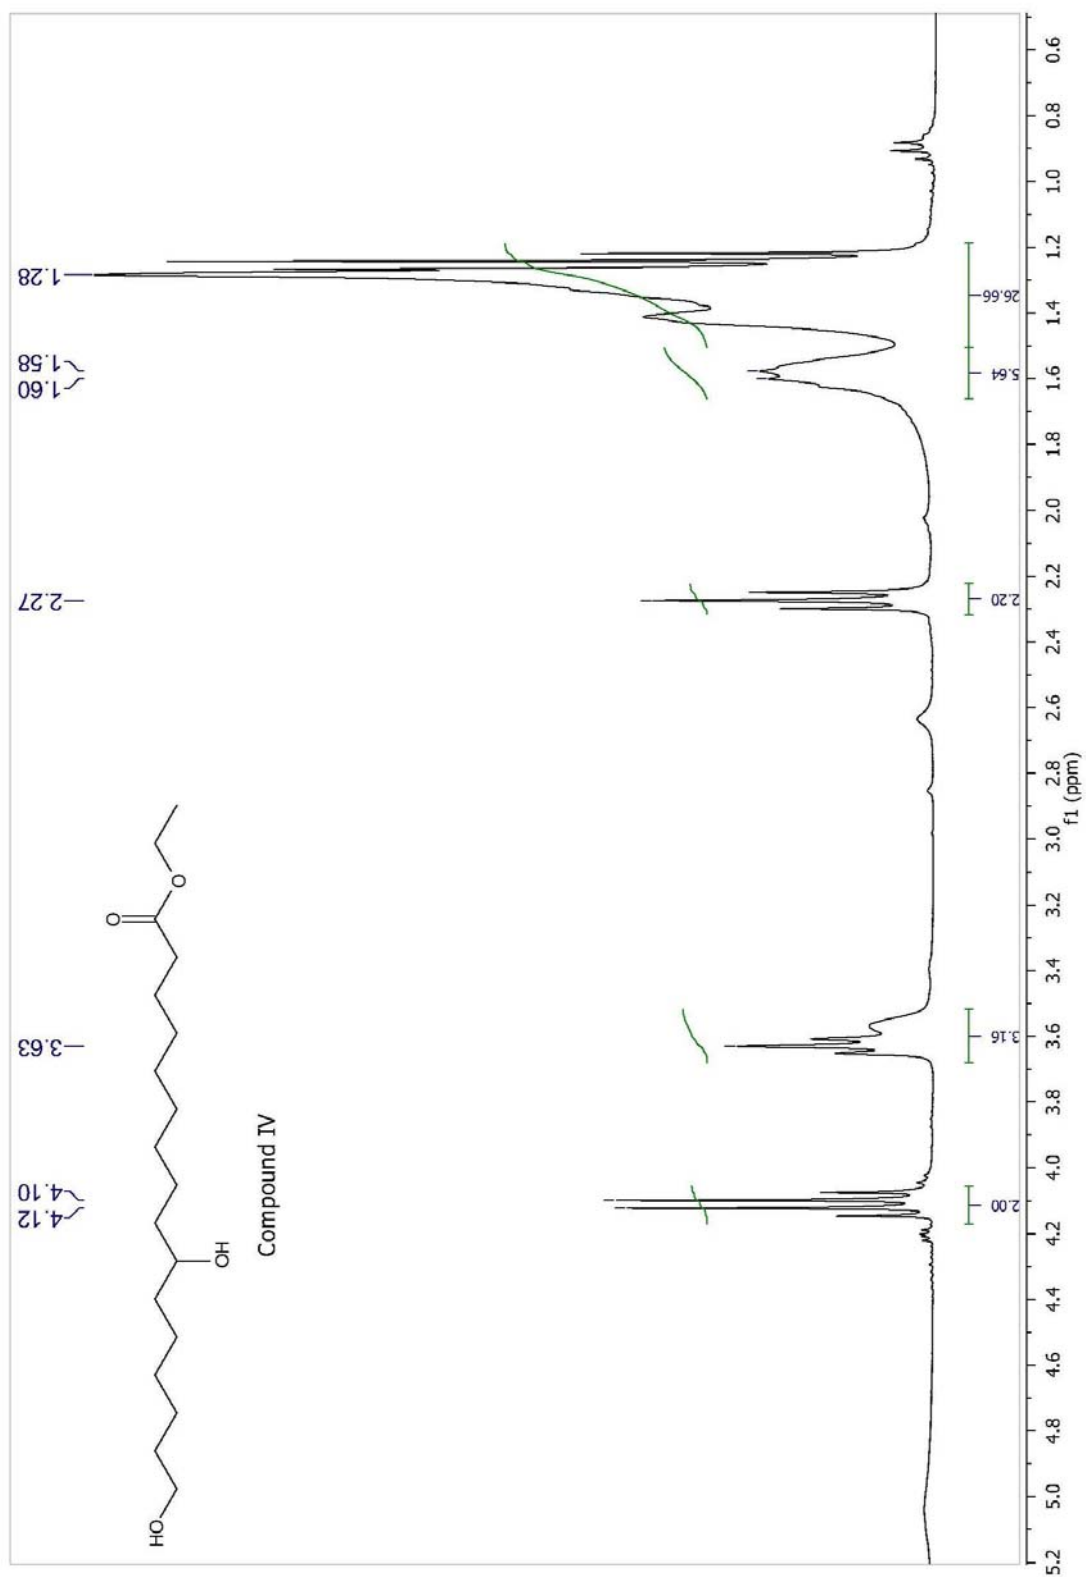

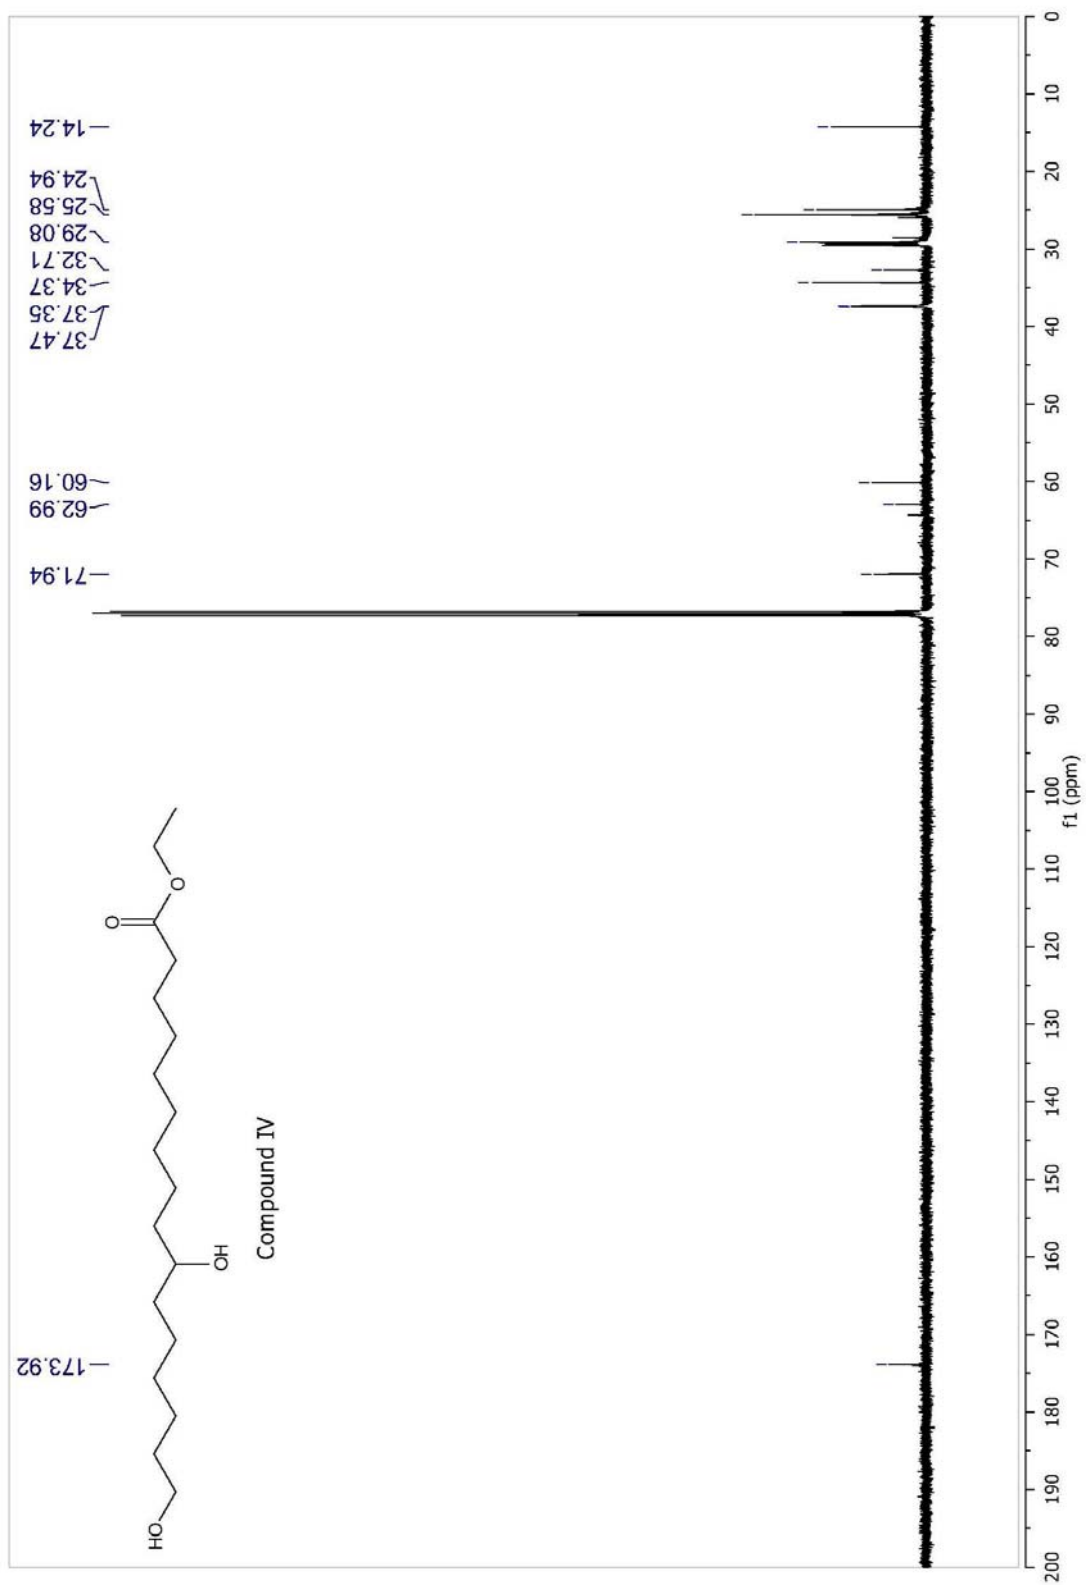

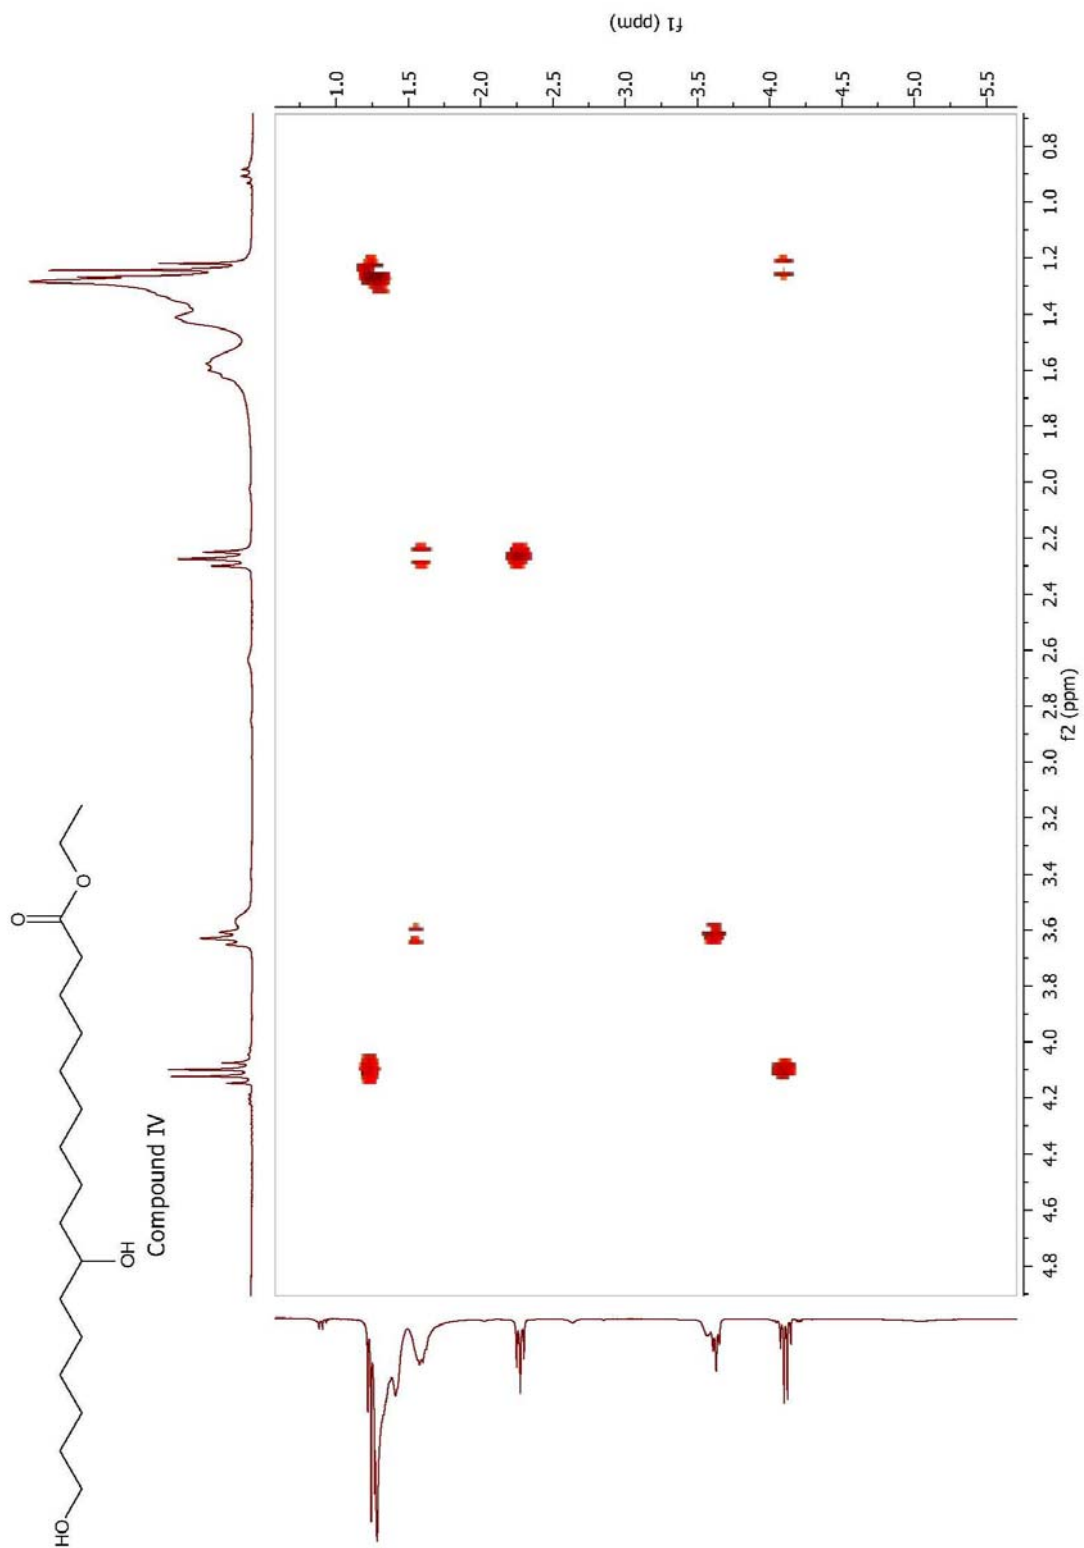



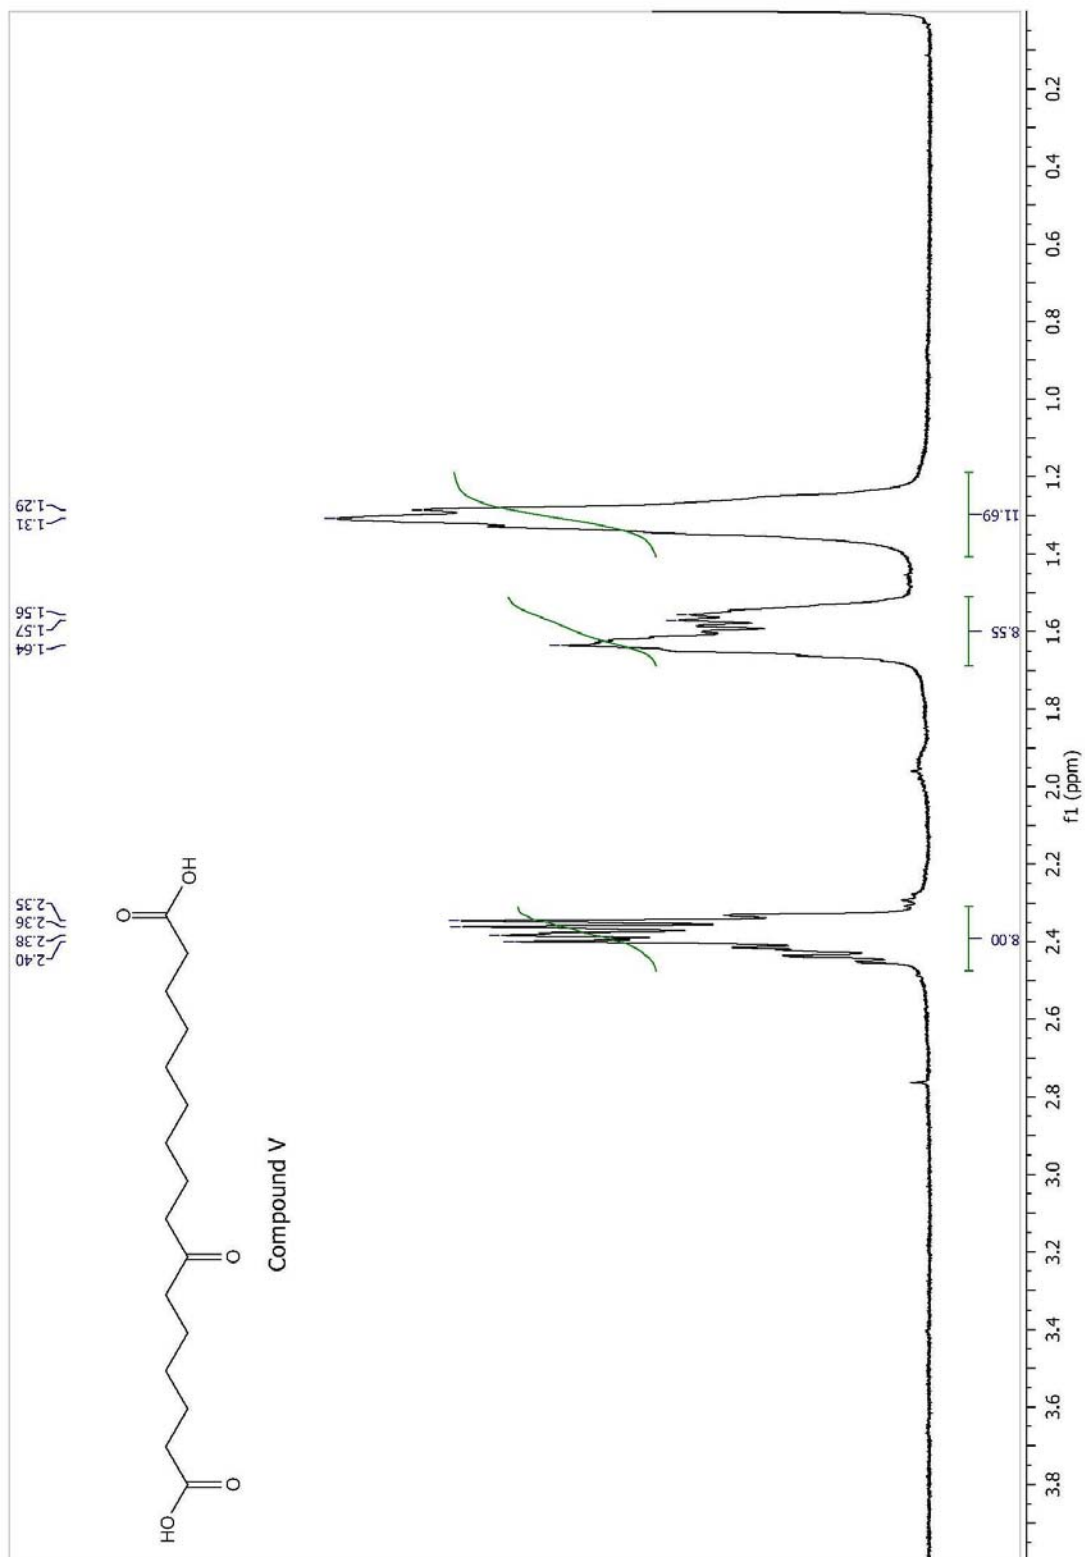

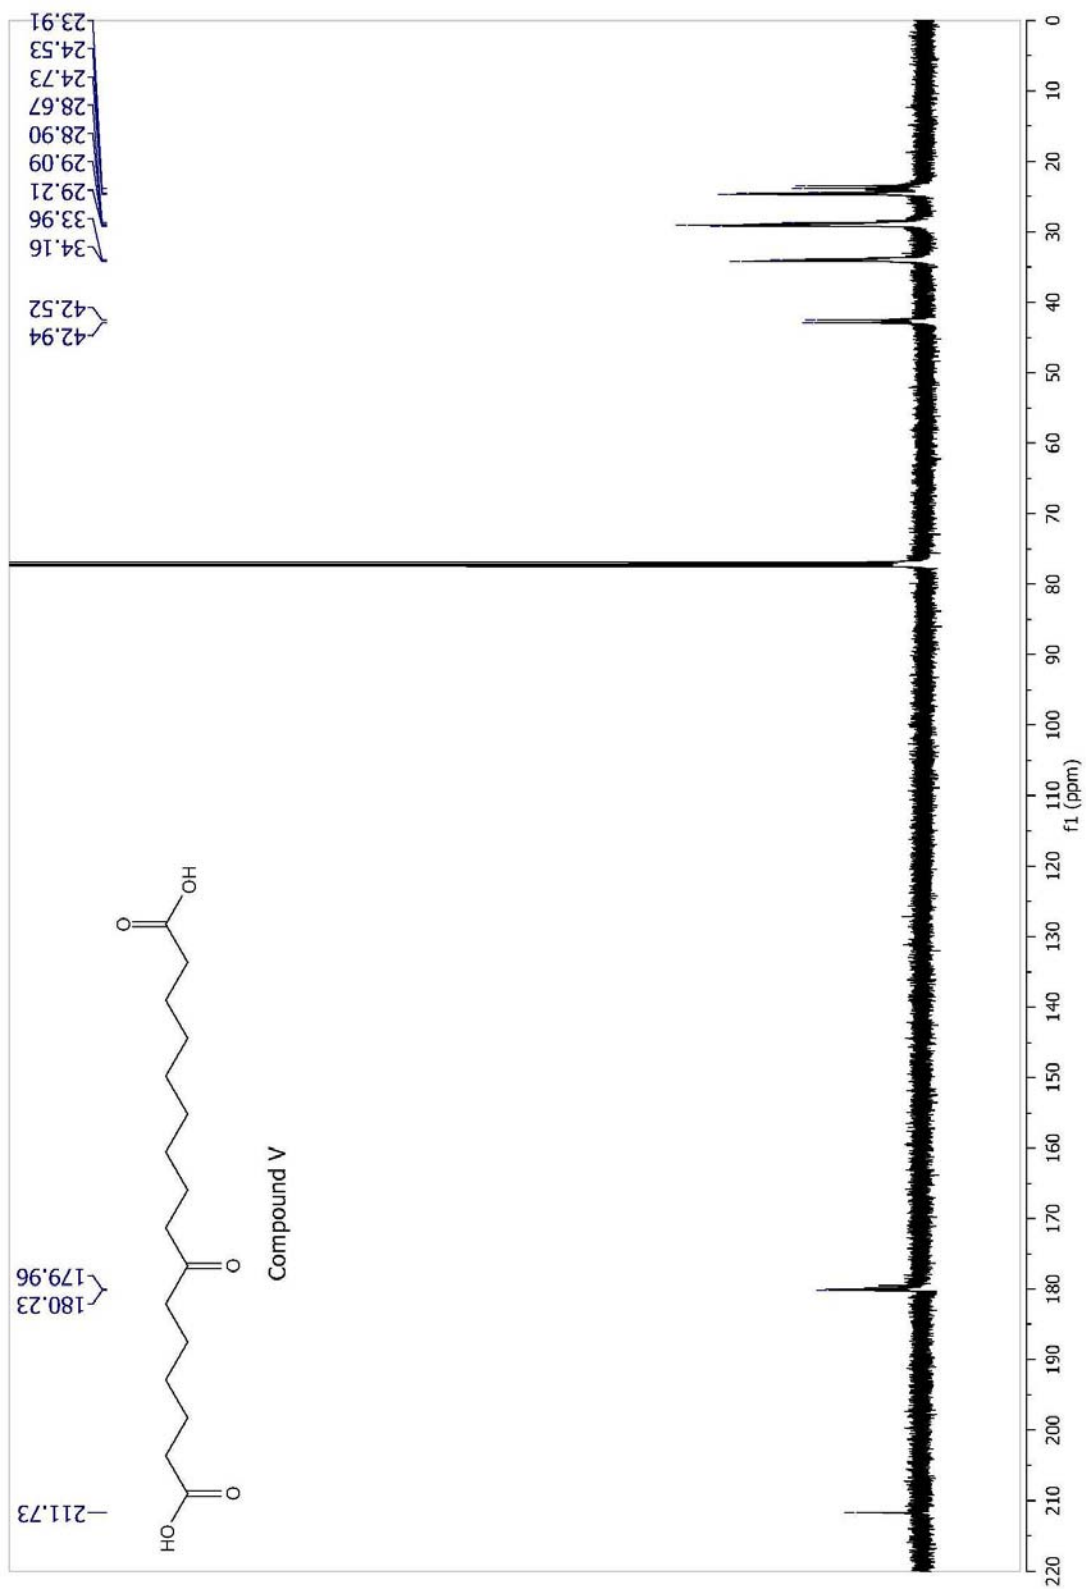

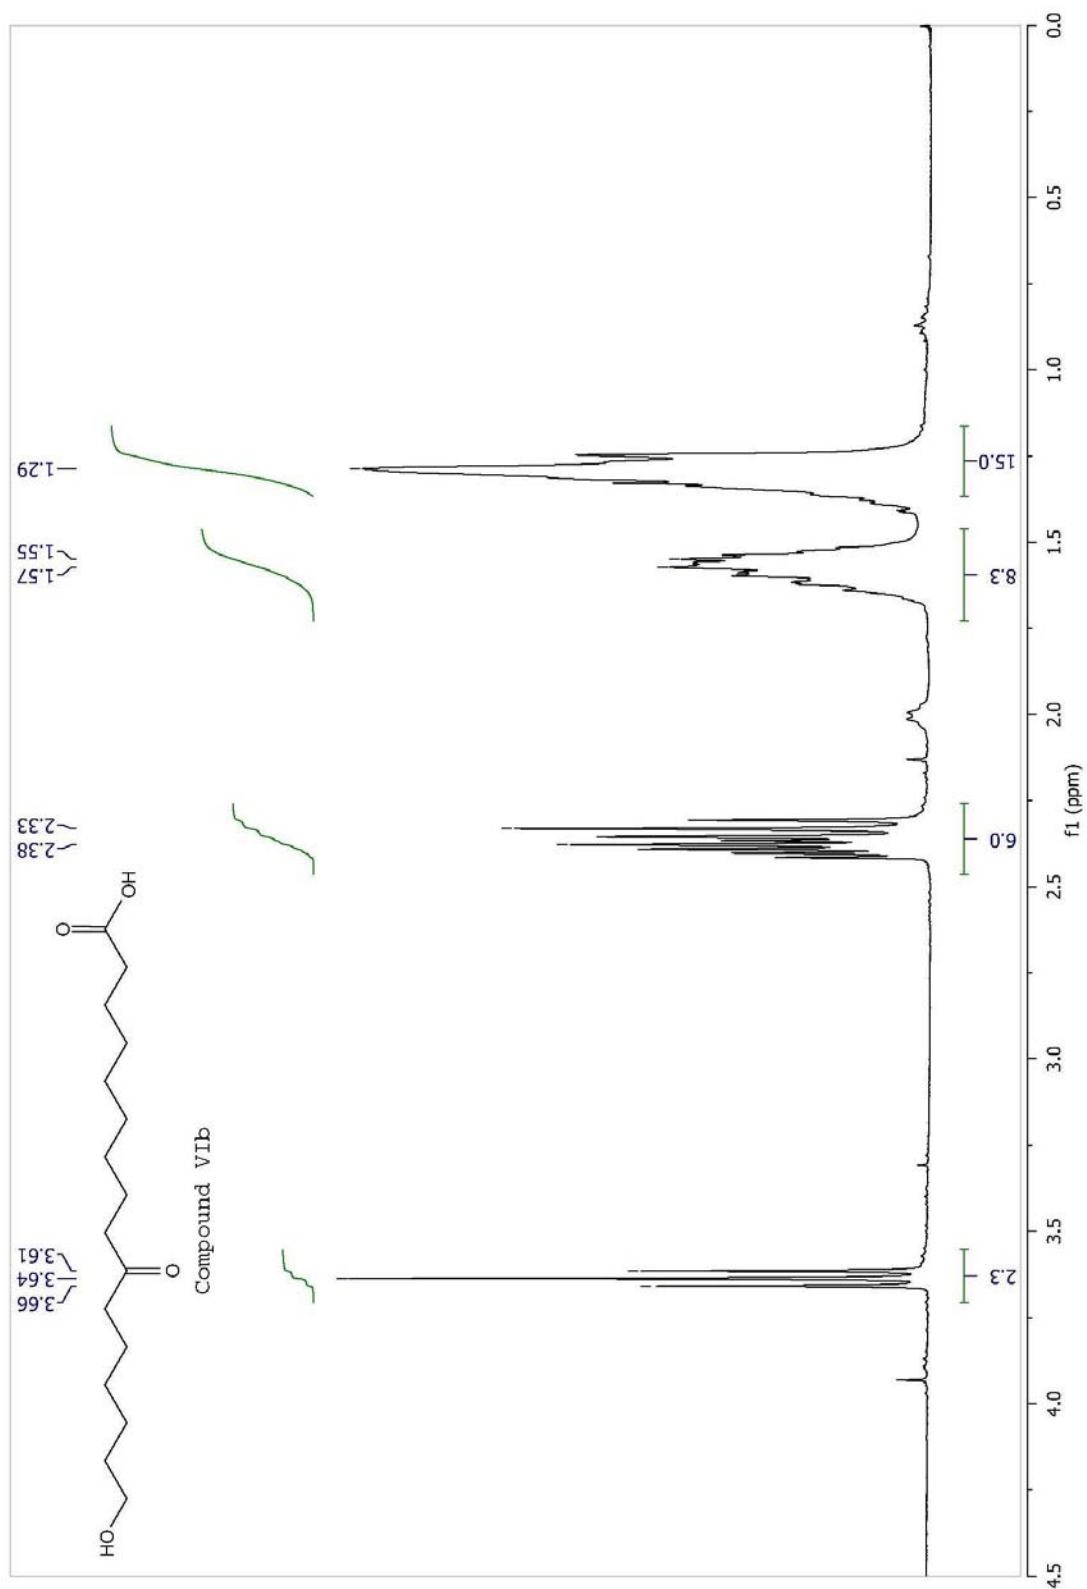

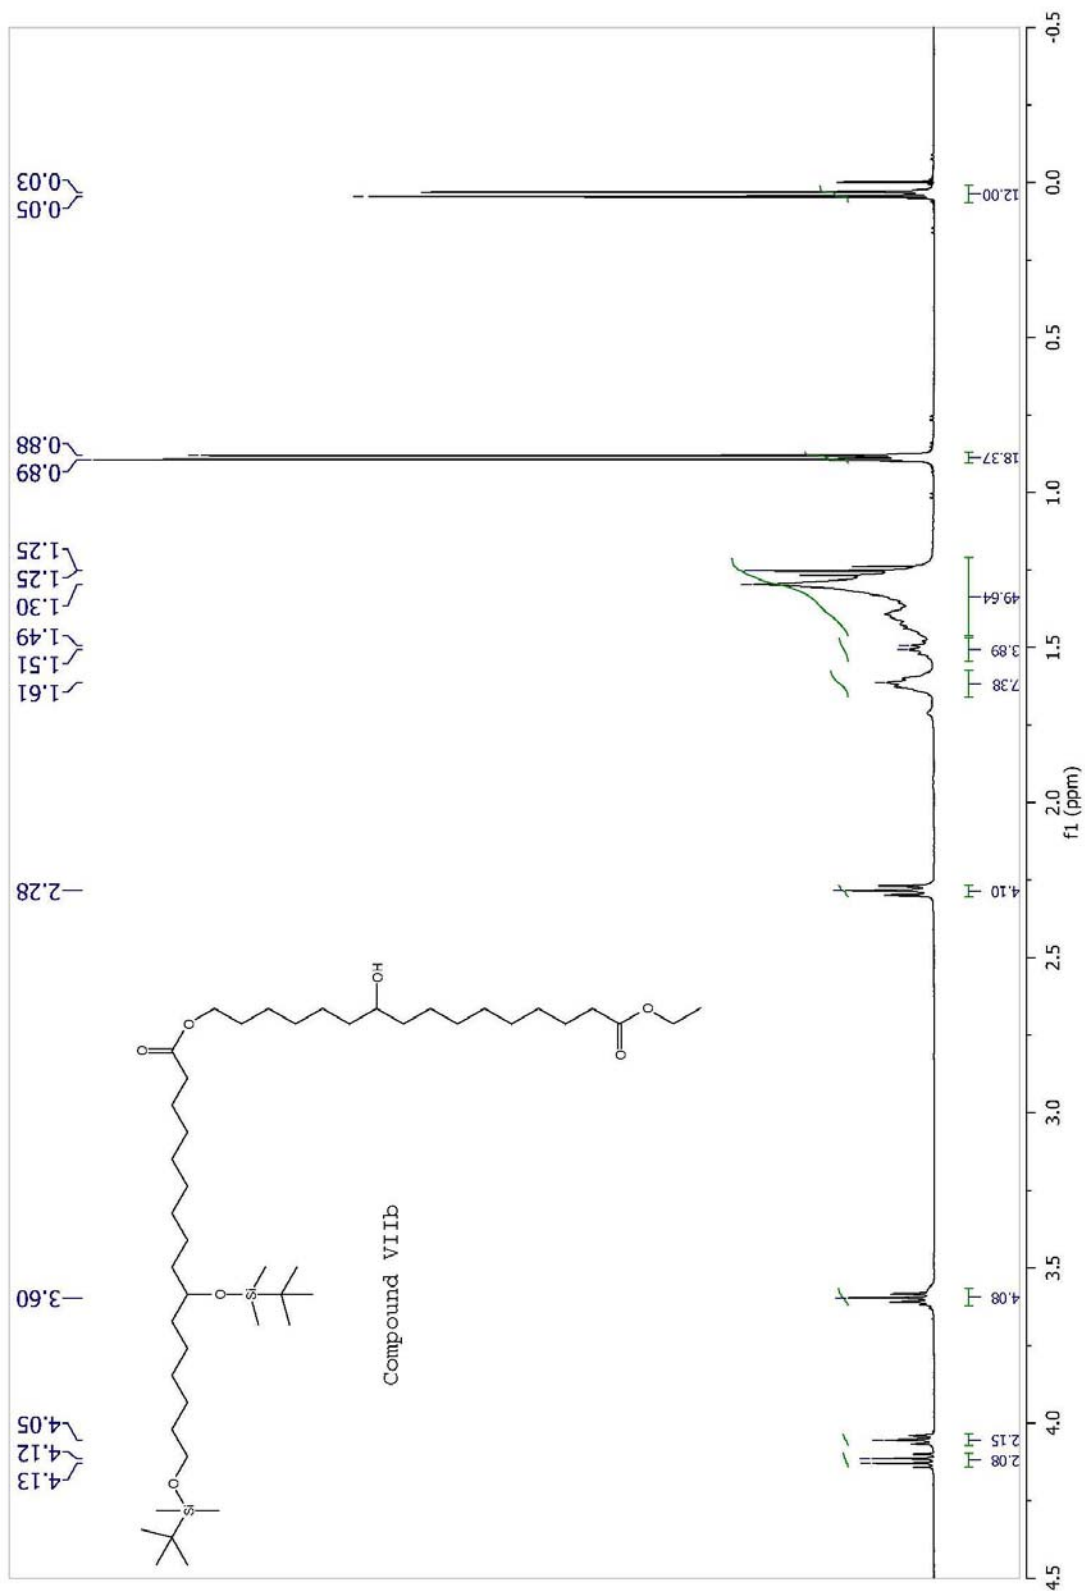

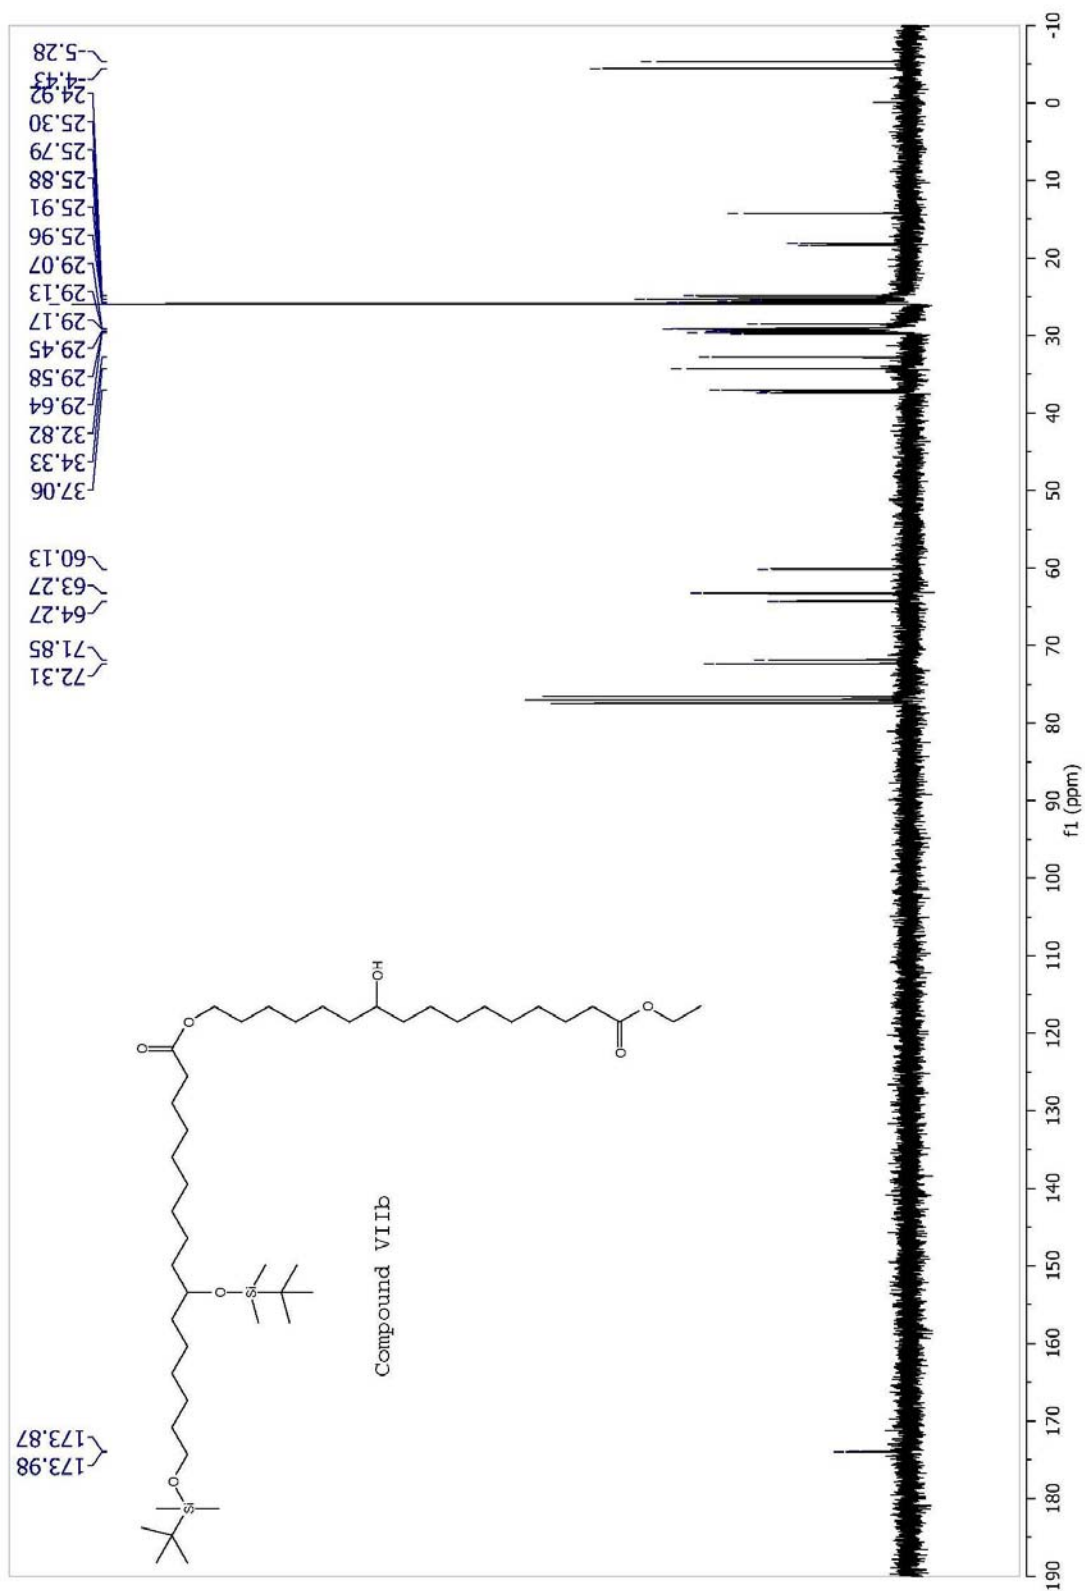

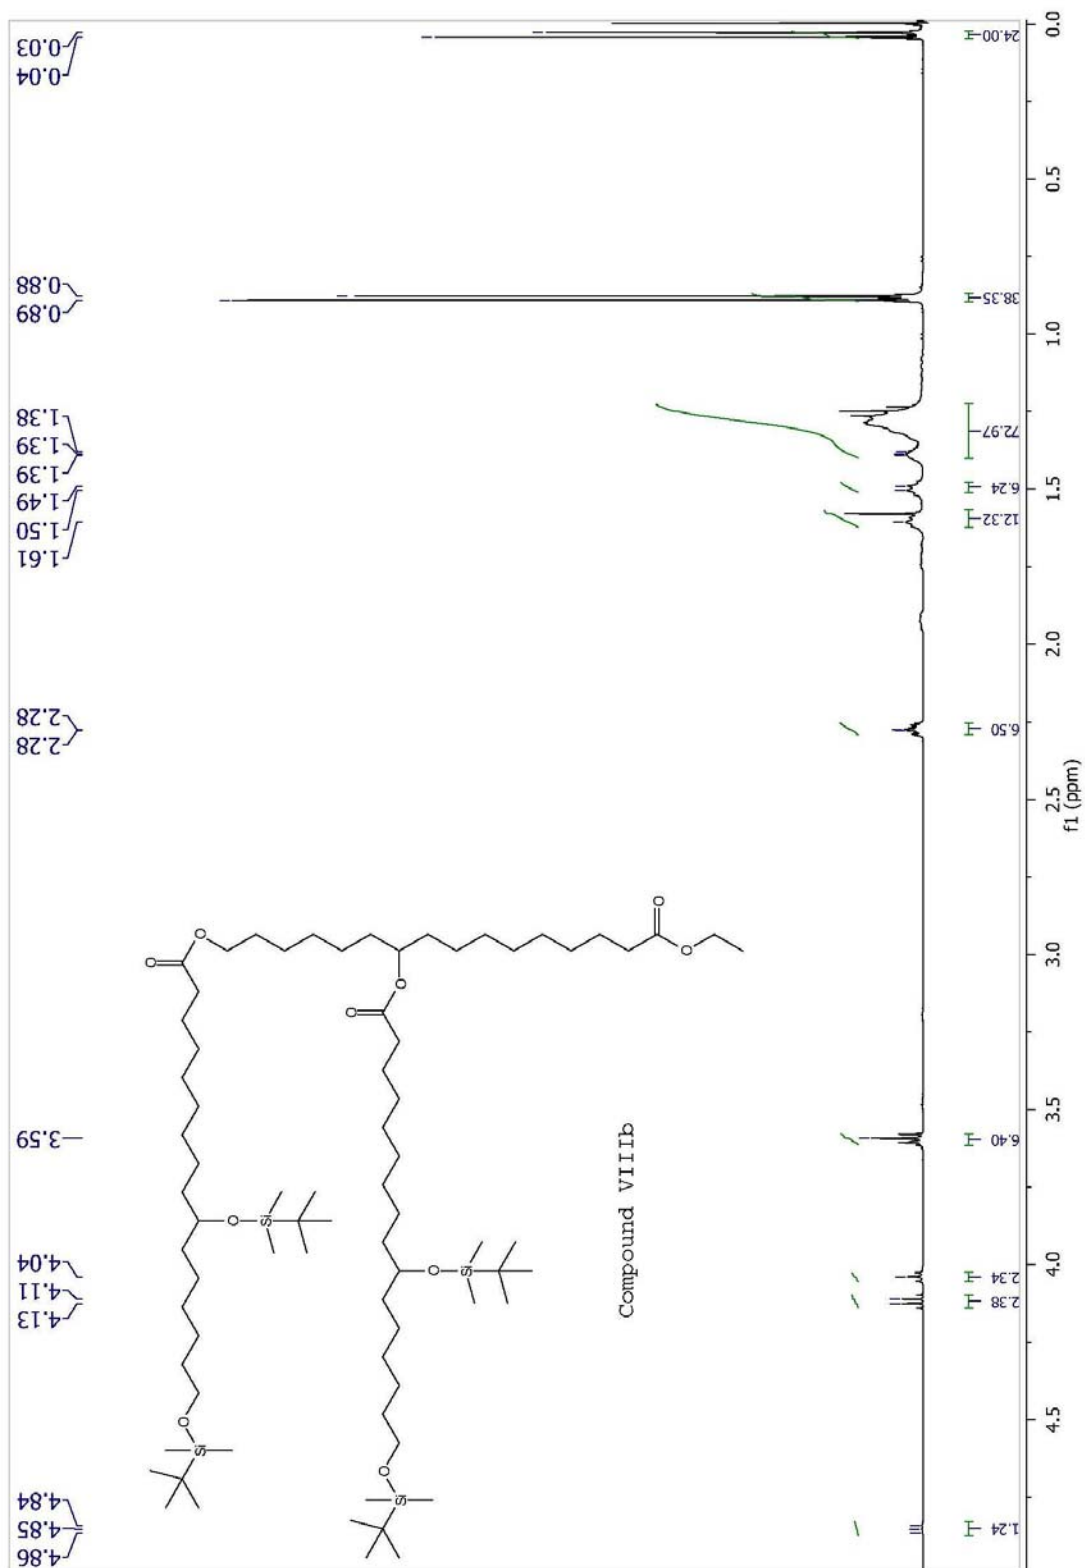

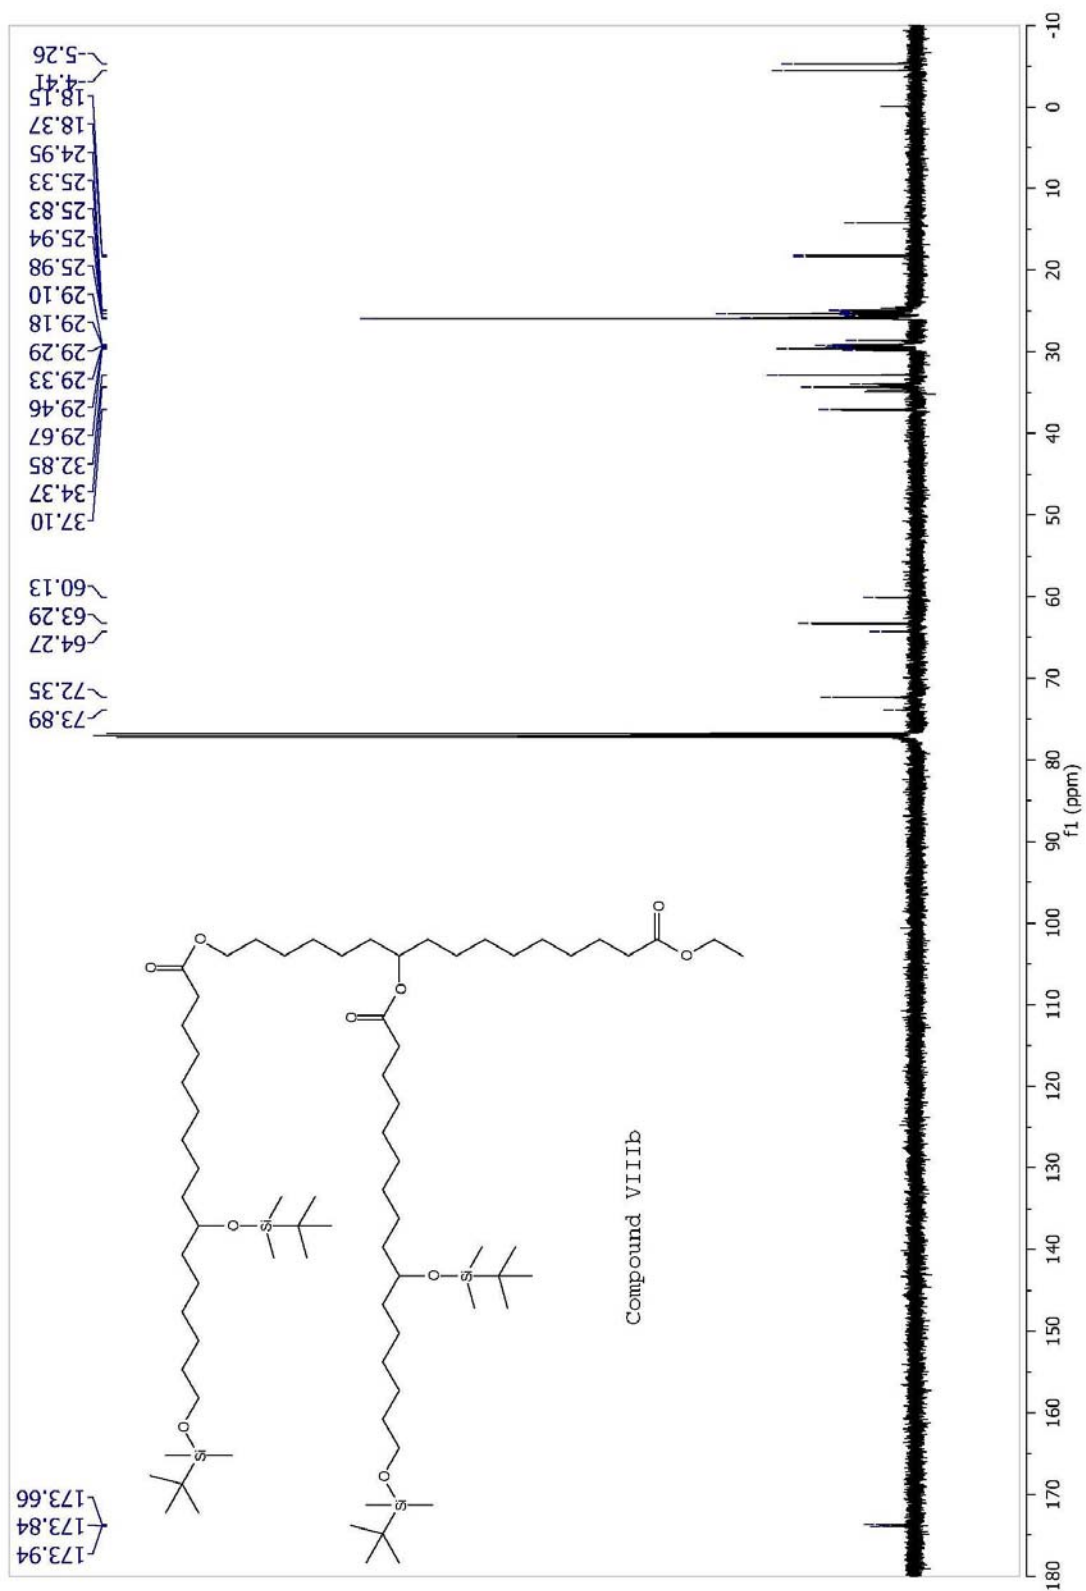

Supplement: molecules-16-04923-s001.pdf [file molecules-16-04923-s001.pdf]
